# Supplementary material for: Molecule-induced gradient electronic potential distribution on a polymeric photocatalyst surface and improved photocatalytic performance
Source: Royal Society of Chemistry journal article supplement (doi:10.1039/c3ta10528h), 2013-01-01
Supplement: c3ta10528h.pdf [file c3ta10528h.pdf]

## Supplementary Material (ESI) for Journal of Material Chemistry

### Molecule-Induced Gradient Electronic Potential Distribution on Polymeric Photocatalyst Surface and the Improved Photocatalytic Performance

**Yong Guo<sup>ab</sup> Ying Wang<sup>abc\*</sup> Fei Kong<sup>ab</sup>, Leilei Luo<sup>ab</sup>, Sheng Chu<sup>ab</sup>, Juncheng Yang<sup>b</sup>, and Zhigang Zhou<sup>ac\*</sup>**

<sup>a</sup> Eco-materials and Renewable Energy Research Center, National Laboratory of Solid State Microstructures, Nanjing University, Nanjing 210093, China.

E-mail: [zgzhou@nju.edu.cn](mailto:zgzhou@nju.edu.cn); Tel: +86-25-83686630

<sup>b</sup> School of Chemistry and Chemical Engineering, Nanjing University, Nanjing 210093, China.

E-mail: [wangy@nju.edu.cn](mailto:wangy@nju.edu.cn); Tel: +86-25-83621219

<sup>c</sup> Kunshan Innovation Institute of Nanjing University, Kunshan 215300, P. R. China

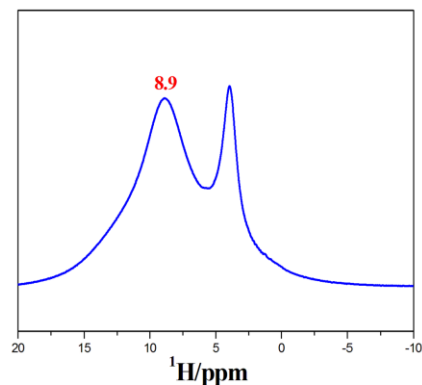

Fig.S1  $^1\text{H}$  NMR spectra of  $\text{g-C}_3\text{N}_4$  sample.

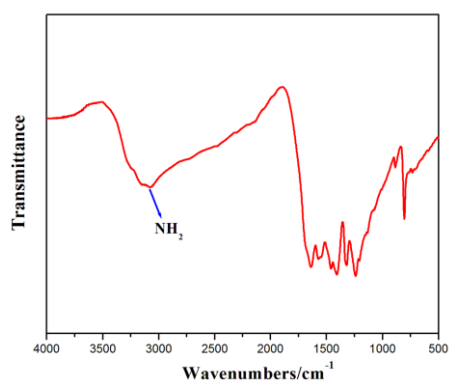

Fig.S2 IR spectra of  $\text{g-C}_3\text{N}_4$  sample.

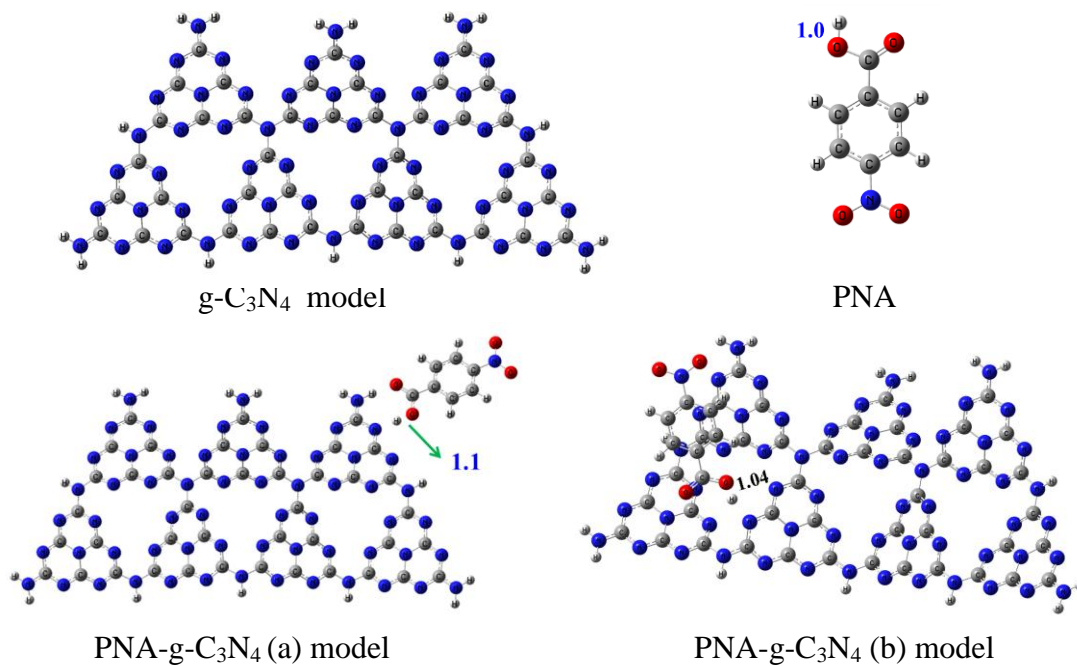

Fig S3 The optimized structure of  $\text{g-C}_3\text{N}_4$ , PNA, PNA-g-C<sub>3</sub>N<sub>4</sub> (a) and PNA-g-C<sub>3</sub>N<sub>4</sub> (b) models.

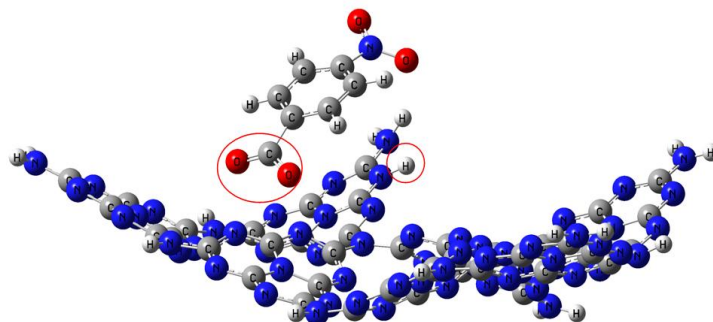

Fig S4 The optimized structure of PNA-g-C<sub>3</sub>N<sub>4</sub> (c) model.

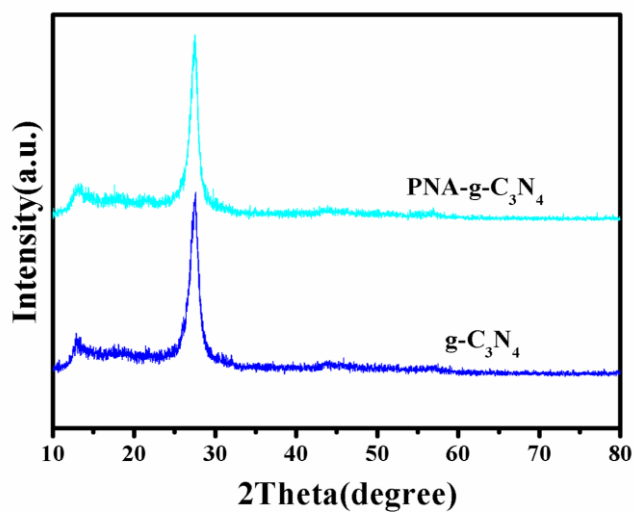

Fig S5 XRD spectra of g-C<sub>3</sub>N<sub>4</sub> and PNA-g-C<sub>3</sub>N<sub>4</sub>.

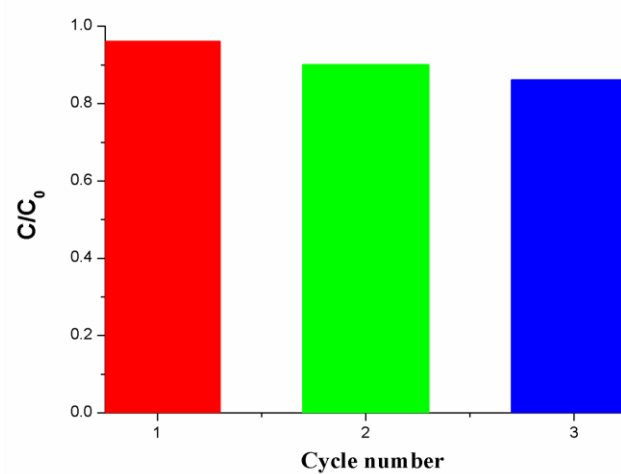

Fig. S6. The recycle usage test of PNA-g-C<sub>3</sub>N<sub>4</sub> photocatalyst.

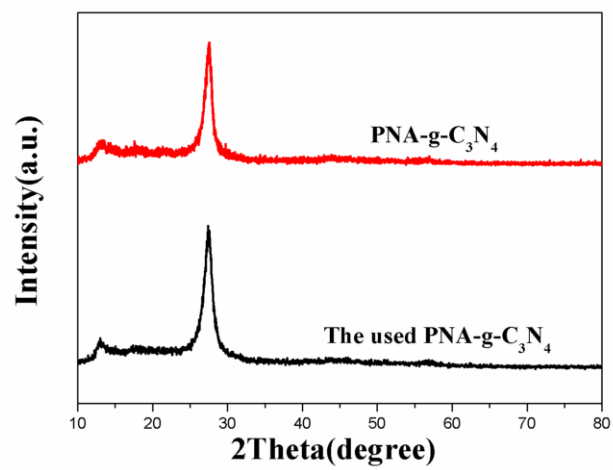

Fig S7 XRD spectra of PNA-g-C<sub>3</sub>N<sub>4</sub> and the used PNA-g-C<sub>3</sub>N<sub>4</sub> samples.
